# Supplementary material for: Elevated temperature modulates the effects of an Endozoicomonadaceae member on the coral holobiont
Source: Research Square preprint supplement (doi:10.21203/rs.3.rs-7518257/v1), 2025-11-03
Supplement: Supplementary file 1 [file 8da854b6f0d17e961dea3c87.docx]

**Supplementary Materials**

For “Elevated temperature modulates the effects of an *Endozoicomonadaceae* member on the coral holobiont”

Jian Zhang# 1 2 3, Jie Li 1 2 #*, Yiyang Zou 4, Cong Liu 1, Qingsong Yang 3, Qiqi Li 1, Si Zhang 1

1 State Key Laboratory of Tropical Oceanography, South China Sea Institute of Oceanology, Chinese Academy of Sciences, Guangzhou, Guangdong, China.

2 Sanya National Marine Ecosystem Research Station, Chinese Academy of Sciences, Sanya, Hainan, China.

3 Xisha Marine Environmental National Observation and Research Station, Sansha, China.

4 Guangdong Center for Marine Development Research, Guangzhou, Guangdong, China.

*Correspondence: lijietaren@scsio.ac.cn (Jie Li)

This file contains 5 supplementary figures (Fig. S1 to S5) and 9 supplementary tables (Table S1 to S9).


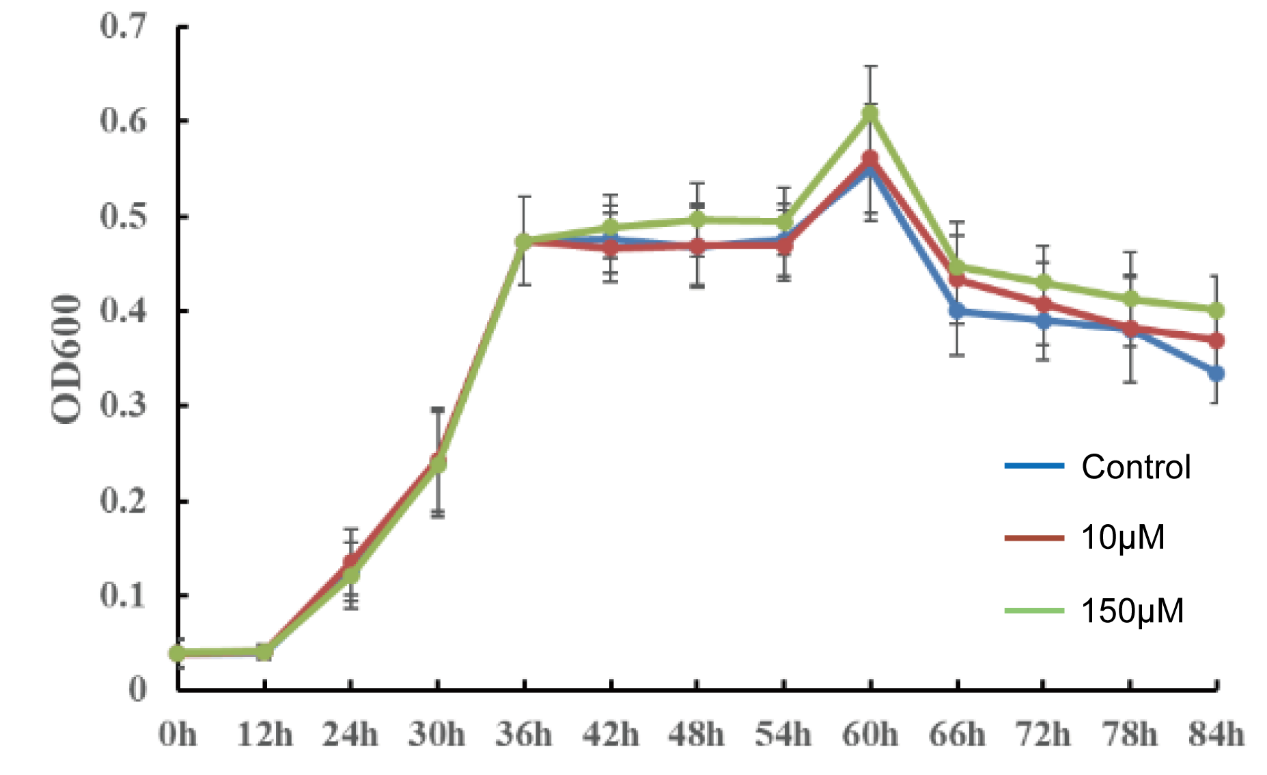


**Fig. S1** Growth curve of strain SCSIO 12664 under different concentrations of TAMRA/SE.


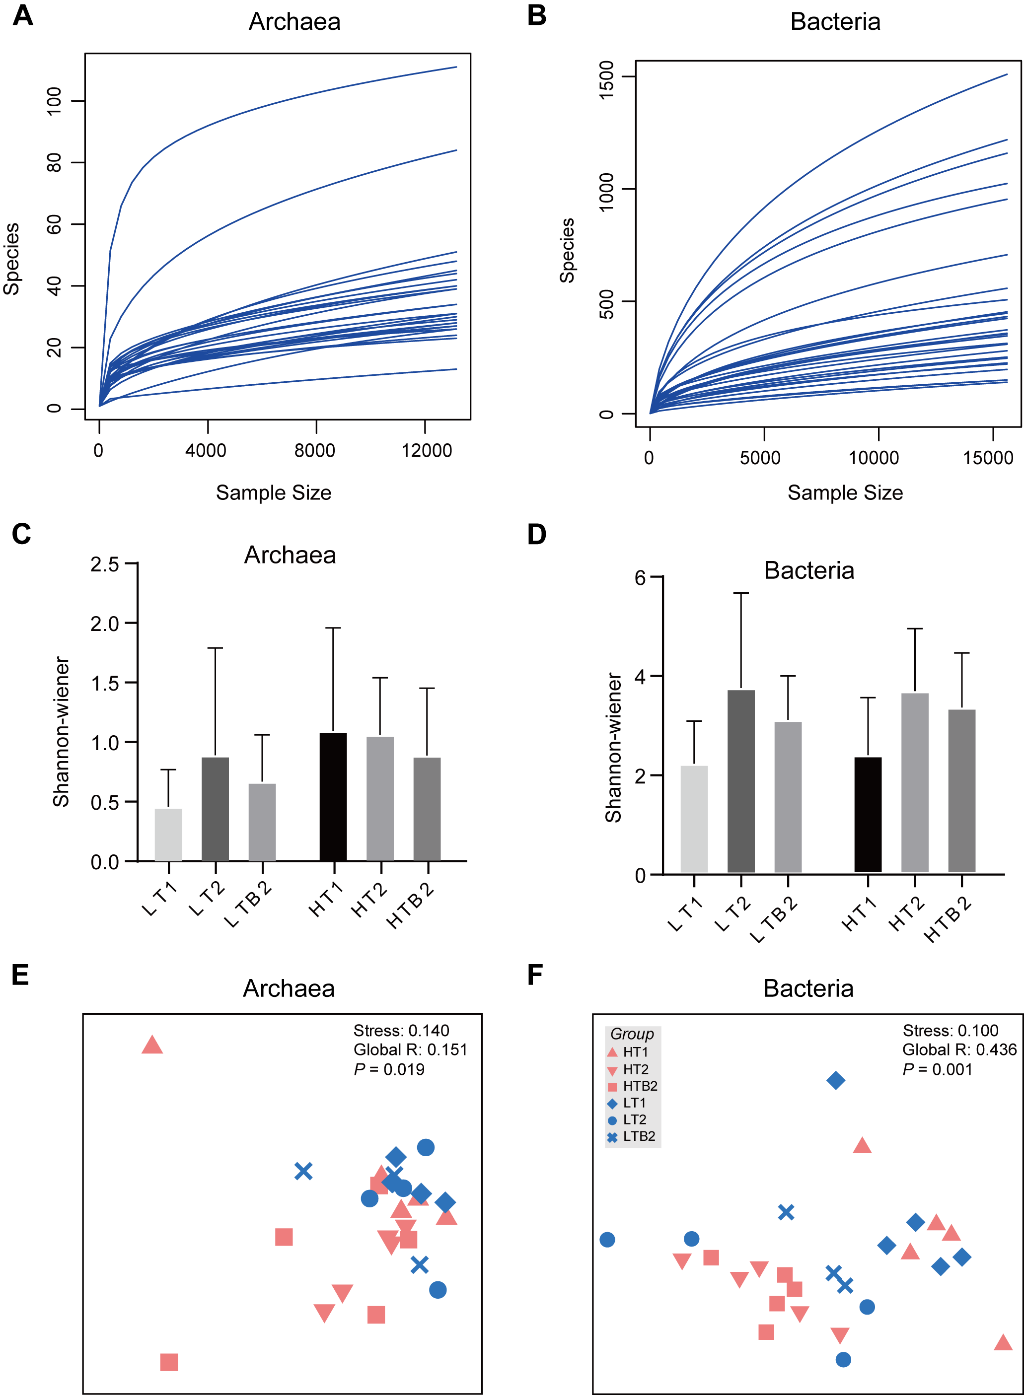


**Fig. S2** Overview of archaeal and bacterial community diversity and composition under different treatments and conditions. (A,B)Therarefaction curve of archaeal (A) and bacterial (B) communities. (C,D) Alpha diversity (the Shannon diversity index) of archaeal (C) and bacterial (D) communities. (E,F) The Non-Metric Multidimensional Scaling (nMDS) plots display the distribution of archaeal (E) and bacterial (F) community segments based on sample type. The stress values for archaeal and bacterial NMDS are 0.140 and 0.100, respectively. The small stress values (<0.2) suggest the reliability of the NMDS results. LT1: group without treatment at the T1 time point under 25°C; LT2: placebo-treated group at the T2 time point under 25°C, LTB2: SCSIO 12664-treated group at the T2 time point under 25°C; HT1: group without treatment at the T1 time point under 32°C; HT2: placebo-treated group at the T2 time point under 32°C, HTB2: SCSIO 12664-treated group at the T2 time point under 32°C.


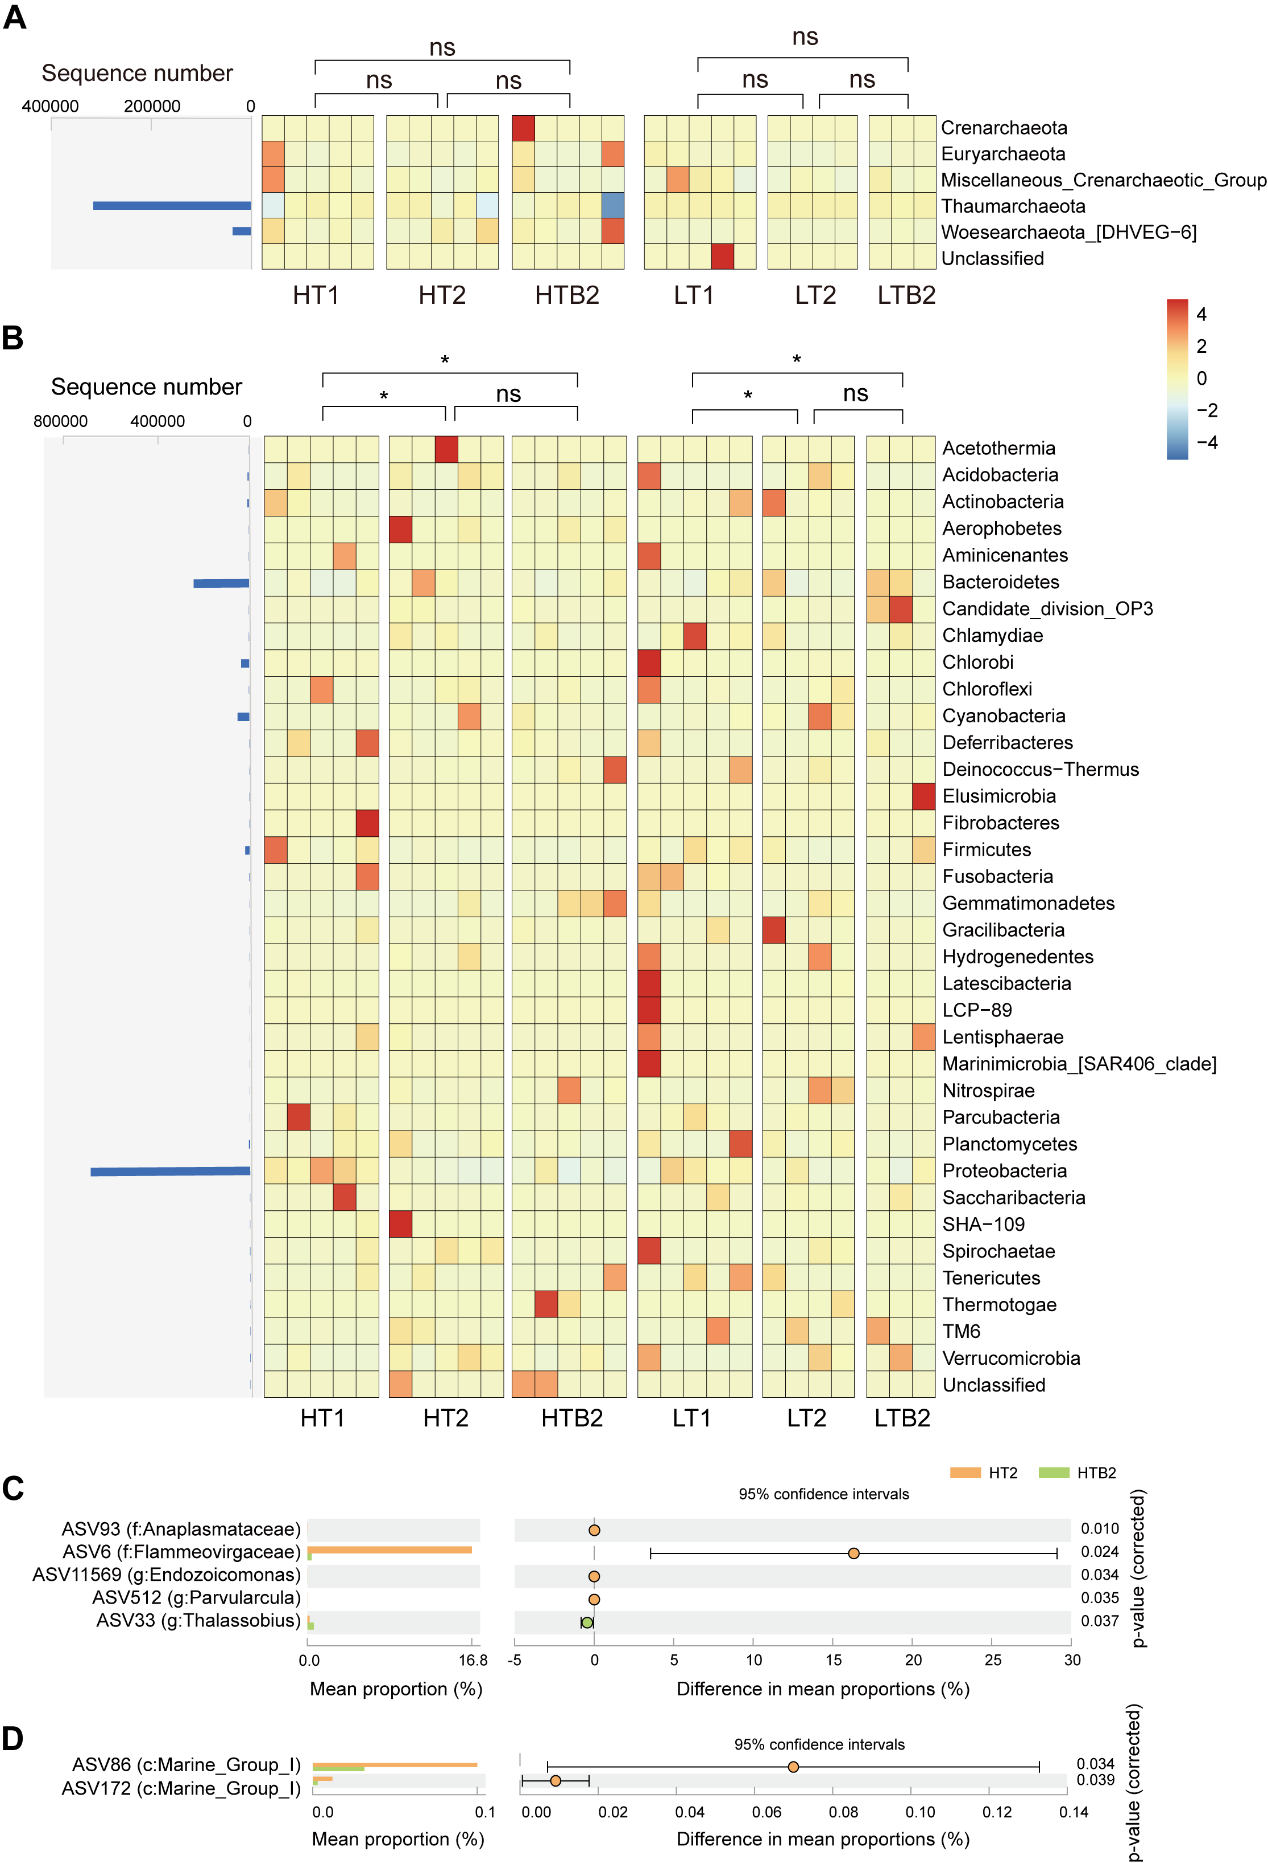


**Fig. S3** Overview of archaeal and bacterial relative abundance, and significant differences among sample types and treatment conditions. Archaeal (A) and bacterial (B) community composition, species relative abundance and analysis of difference between different sample type based on PERMANOVA, ns (not significant) denotes p.adjusted > 0.05; * (significant) denotes p.adjusted < 0.05. (C,D) Differential analysis of the relative abundance of bacterial (C) and archaeal (D) ASVs using STAMP. The analysis compares the ASV-level relative abundances among different treatment groups and conditions. Significant differences (p < 0.05) are highlighted, with the effect size represented on the x-axis. LT1: group without treatment at the T1 time point under 25°C; LT2: placebo-treated group at the T2 time point under 25°C, LTB2: SCSIO 12664-treated group at the T2 time point under 25°C; HT1: group without treatment at the T1 time point under 32°C; HT2: placebo-treated group at the T2 time point under 32°C, HTB2: SCSIO 12664-treated group at the T2 time point under 32°C.


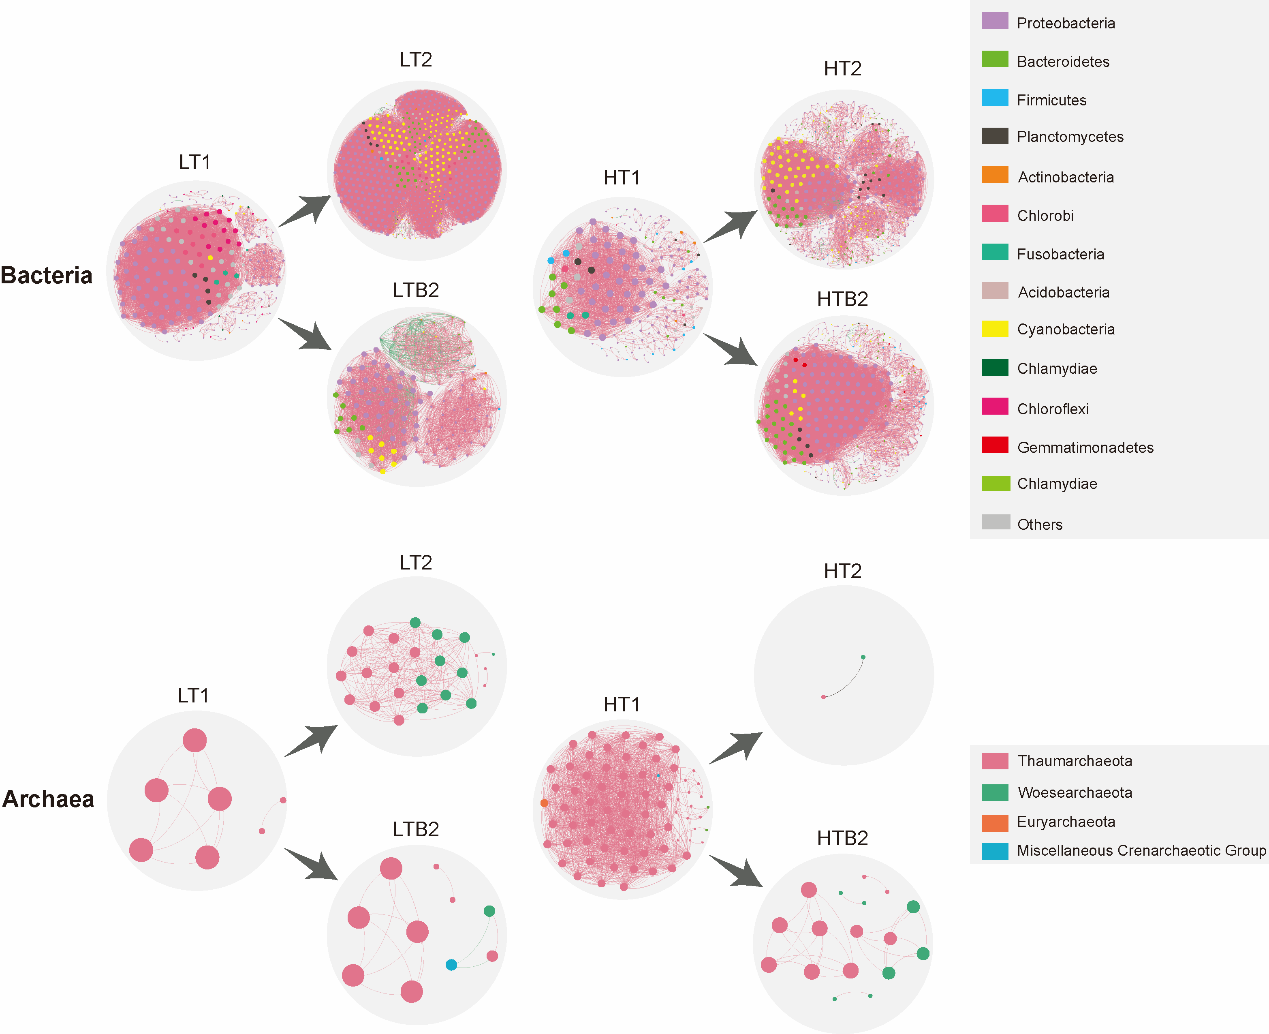


**Fig. S4** Bacterial (Up) and Archaeal (Bottom) interaction networks of different group of samples. LT1: group without treatment at the T1 time point under 25°C; LT2: placebo-treated group at the T2 time point under 25°C, LTB2: SCSIO 12664-treated group at the T2 time point under 25°C; HT1: group without treatment at the T1 time point under 32°C; HT2: placebo-treated group at the T2 time point under 32°C, HTB2: SCSIO 12664-treated group at the T2 time point under 32°C.


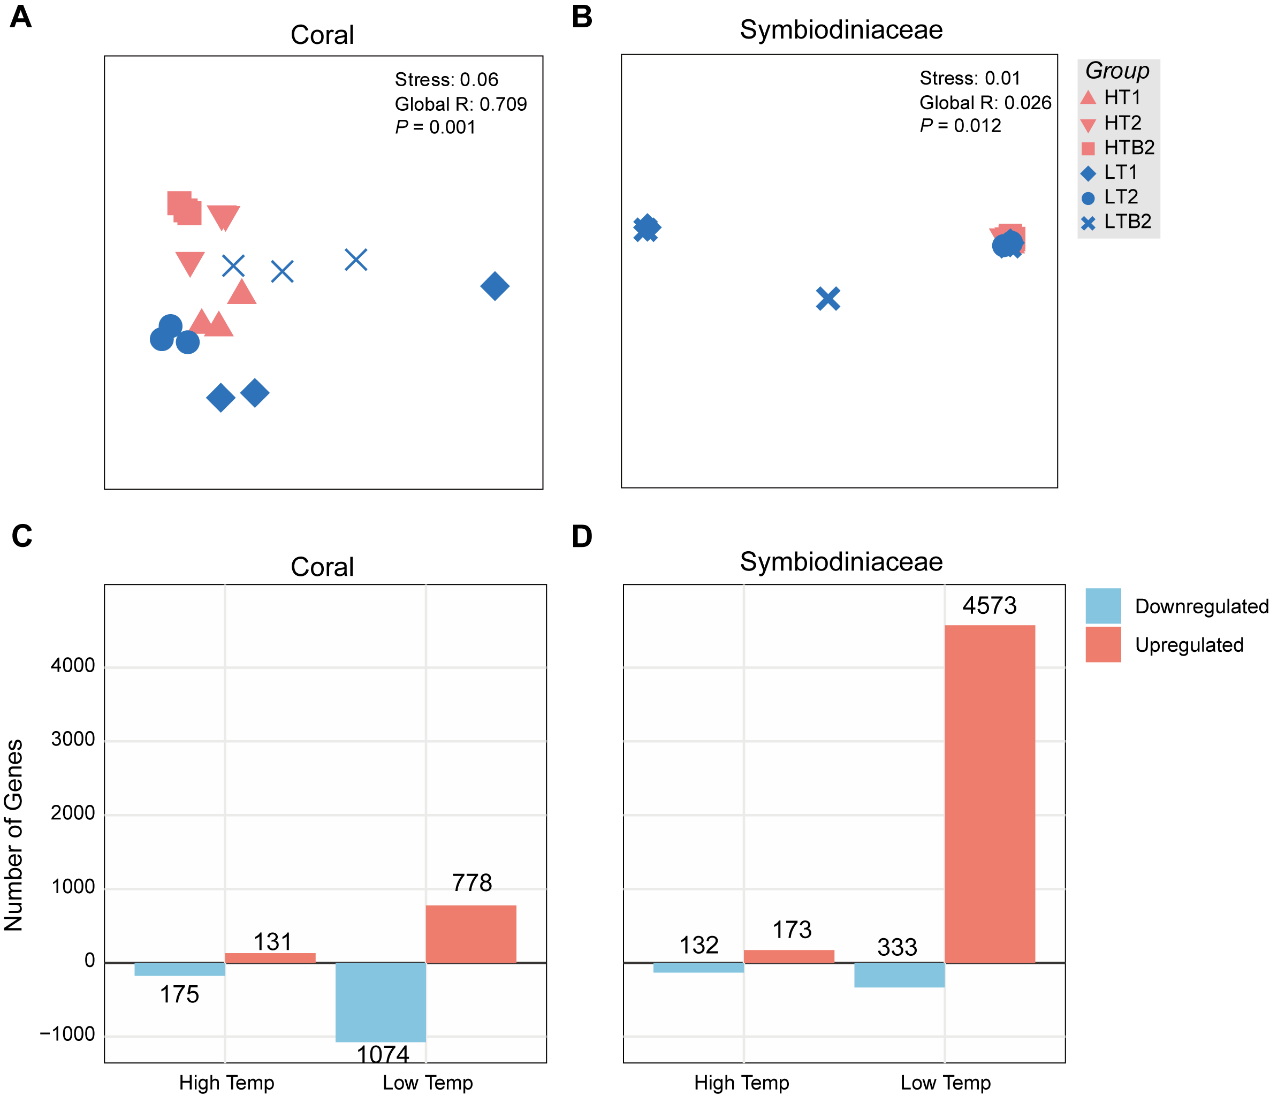


**Fig. S5** Non-Metric Multidimensional Scaling (nMDS) of plots of coral host and *Symbiodiniaceae* transcript expression portions by sample type. Stress for NMDS of coral host is 0.06 and for NMDS of *Symbiodiniaceae* is 0.01. The stress value of NMDS results was small (<0.2), indicating that the NMDS results were reliable. LT1: group without treatment at the T1 time point under 25°C; LT2: placebo-treated group at the T2 time point under 25°C, LTB2: SCSIO 12664-treated group at the T2 time point under 25°C; HT1: group without treatment at the T1 time point under 32°C; HT2: placebo-treated group at the T2 time point under 32°C, HTB2: SCSIO 12664-treated group at the T2 time point under 32°C.

**Table S1** Information on *Endozoicomonadaceae* used in this study.

| Database | Assembly Accession | Strain name |
| --- | --- | --- |
| NCBI | GCA_025562755.1 | *Endozoicomonas euniceicola* EF212 |
| NCBI | GCA_001583435.1 | *Endozoicomonas* *montiporae* CL-33 |
| NCBI | GCA_002864045.1 | *Endozoicomonas* *acroporae* Acr-14 |
| NCBI | GCA_000710775.1 | *Endozoicomonas* *elysicola* DSM 22380 |
| NCBI | GCA_025562715.2 | *Endozoicomonas gorgoniicola* PS125 |
| NCBI | GCA_900174585.1 | *Parendozoicomonas haliclonae* S-B4-1U |
| NCBI | GCA_018263925.1 | *Kistimonas asteriae* KMD 001 |
| NCBI | GCA_023502345.1 | *Parendozoicomonas callyspongiae* 2012CJ34-2 |
| NCBI | GCA_000722635.1 | *Endozoicomonas numazuensis* DSM 25634 |
| NCBI | GCA_001562015.1 | *Endozoicomonas arenosclerae* ab112 |
| NCBI | GCA_001646945.1 | *Endozoicomonas ascidiicola* AVMART05 |
| NCBI | GCA_039540975.1 | *Kistimonas scapharcae* JCM 17805 |
| NCBI | GCA_001647025.2 | *Endozoicomonas atrinae* WP70 |
| NCBI | GCA_031528575.1 | Candidatus *Sororendozoicomonas aggregata* Pac_P3-11-1 |
| NCBI | GCA_032883915.1 | *Endozoicomonas sp.* 8E |
| NCBI | GCA_023716865.1 | *Endozoicomonas sp.* SCSIO W0465 |
| NCBI | GCA_027366555.1 | *Endozoicomonas sp.* GU-1 |
| NCBI | GCA_027366395.1 | *Endozoicomonas sp.* GU-1 |
| NCBI | GCA_023822025.1 | *Endozoicomonas sp.* 4G |
| NCBI | GCA_025643335.1 | *Endozoicomonas sp.* Mp262 |
| NCBI | GCA_000373945.1 | *Endozoicomonas elysicola* DSM 22380 |
| NCBI | GCA_000722565.1 | *Endozoicomonas montiporae* LMG 24815 |
| NCBI | GCA_010994325.1 | *Endozoicomonas acroporae* Acr-5 |
| NCBI | GCA_010994335.1 | *Endozoicomonas acroporae* Acr-1 |
| NCBI | GCA_040549065.1 | *Endozoicomonas sp.* NE43 |
| NCBI | GCA_040549045.1 | *Endozoicomonas sp.* NE40 |
| NCBI | GCA_040549005.1 | *Endozoicomonas sp.* NE35 |
| NCBI | GCA_040549035.1 | *Endozoicomonas sp.* NE41 |
| NCBI | GCA_009653635.1 | *Endozoicomonas sp.* OPT23 |
| NCBI | GCA_017744135.1 | *Endozoicomonas sp.* G2_2 |
| NCBI | GCA_017744155.1 | *Endozoicomonas sp.* G2_1 |
| NCBI | GCA_024606225.1 | *Endozoicomonas sp.* ISHI1 |
| NCBI | GCA_947331445.1 | *Parendozoicomonas sp.* Alg238-R29 |
| NCBI | GCA_001646955.1 | *Endozoicomonas ascidiicola* KASP37 |
| NCBI | GCA_024606265.1 | *Endozoicomonas sp.* SESOKO1 |
| NCBI | GCA_024606345.1 | *Endozoicomonas sp.* YOMI1 |
| NCBI | GCA_024606245.1 | *Endozoicomonas sp.* SESOKO2 |
| NCBI | GCA_024606325.1 | *Endozoicomonas sp.* ONNA1 |
| NCBI | GCA_024606275.1 | *Endozoicomonas sp.* SESOKO4 |
| NCBI | GCA_024606255.1 | *Endozoicomonas sp.* SESOKO3 |
| NCBI | GCA_024606365.1 | *Endozoicomonas sp.* ONNA2 |
| NCBI | GCA_004028165.1 | *Endozoicomonadaceae* bacterium GTF-13 |
| NCBI | GCA_030674875.1 | Candidatus *Endonucleobacter sp.* IAP7 |
| NCBI | GCA_030674915.1 | Candidatus *Endonucleobacter bathymodioli* IAP13 |
| NCBI | GCA_947495845.1 | *Endozoicomonas sp.* 4-162 |
| NCBI | GCA_002238585.1 | *Kistimonas sp.* bin40 |
| NCBI | GCA_023146365.1 | *Endozoicomonadaceae* bacterium SW_3_10 |
| NCBI | GCA_028728195.1 | *Endozoicomonas sp.* MAG-14 |
| NCBI | GCA_001729985.1 | *Endozoicomonas sp.* AB1-5 |
| NCBI | GCA_900299555.1 | *Endozoicomonas cretensis sp.* |
| NCBI | GCA_015163815.1 | *Endozoicomonadaceae* bacterium HC_Bin2 |
| NCBI | GCA_024509075.1 | *Endozoicomonas sp.* HY_Ok |
| NCBI | GCA_026712775.1 | *Kistimonas sp.* APA_bin_67 |
| NCBI | GCA_024509095.1 | *Endozoicomonas sp.* W5_Kt |
| NCBI | GCA_031546025.1 | Candidatus *Sororendozoicomonas aggregata* Pac_X7 |
| NCBI | GCA_028239315.1 | *Endozoicomonas sp.* AM-377-N14 |
| NCBI | GCA_026710285.1 | *Endozoicomonadaceae* bacterium CAR1_bin_20 |
| NCBI | GCA_031844845.1 | *Endozoicomonas sp.* MAGCC1 |
| NCBI | GCA_027942505.1 | *Endozoicomonas sp.* Pac_F2a |
| NCBI | GCA_027942495.1 | *Endozoicomonas sp.* Pac_F1 |
| NCBI | GCA_001562005.1 | *Endozoicomonas arenosclerae* E-MC227 |
| NCBI | GCA_015163765.1 | *Endozoicomonadaceae* bacterium HS_Bin3 |
| NCBI | GCA_012267545.1 | *Endozoicomonadaceae* bacterium Plut_88861 |
| NCBI | GCA_026709165.1 | *Endozoicomonadaceae* bacterium CAR3_bin_23 |
| RAST | 6666666.314155 | *Endozoicomonas sp.* Endoz6c |
| RAST | 6666666.127879 | *Endozoicomonas pistillata* TypeB |
| RAST | 6666666.127878 | *Endozoicomonas pistillata* TypeA |
| RAST | 305899.13 | *Endozoicomonas humilis* MG |
| RAST | 305899.6 | *Endozoicomonas verrucosa* undefined |

**Table S2** Staining efficiency of 5(6)-TAMRA, SE.

| Incubation time (days) | 10 μM: Efficiency of staining (%) | 150 μM: Efficiency of staining (%) |
| --- | --- | --- |
| 0 | 94.67 ± 0.41 | 97.11 ± 2.30 |
| 3 | 89.94±2.23 | 95.07±2.78 |
| 7 | 61.07±3.48 | 81.44±5.05 |
| 10 | 57.01±3.80 | 54.20±3.82 |
| 15 | 37.06±3.78 | 40.33±4.92 |
| 18 | 21.11±3.77 | 23.77±5.64 |

**Table S3** The results of BIOLOG GEN III MicroPlate assays of strain SCSIO 12664 labeled and unlabeled with TAMRA/SE.

| Cell no. | index | SCSIO 12664 | SCSIO 12664 stained with TAMRA/SE |
| --- | --- | --- | --- |
| A1 | Negative Control | - | - |
| A2 | Dextrin | - | - |
| A3 | D-Maltose | - | - |
| A4 | D-Trehalose | - | - |
| A5 | D-Cellobiose | + | + |
| A6 | Gentiobiose | - | - |
| A7 | Sucrose | - | - |
| A8 | D-Turanose | - | - |
| A9 | Stachyose | - | - |
| A10 | Positive Control | + | + |
| A11 | pH 6 | - | - |
| A12 | pH 5 | - | - |
| B1 | D-Raffinose | - | - |
| B2 | α-D-Lactose | + | + |
| B3 | D-Melibiose | - | - |
| B4 | β-Methyl-D-Glucoside | - | - |
| B5 | D-Salicin | - | - |
| B6 | N-Acetyl-D-Glucosamine | + | + |
| B7 | N-Acetyl-β-D-Mannosamine | - | - |
| B8 | N-Acetyl-D-Galactosamine | - | - |
| B9 | N-Acetyl Neuraminic Acid | - | - |
| B10 | 1% NaCl | + | + |
| B11 | 4% NaCl | - | - |
| B12 | 8% NaCl | - | - |
| C1 | α-D-Glucose | + | + |
| C2 | D-Mannose | + | + |
| C3 | D-Fructose | - | - |
| C4 | D-Galactose | - | - |
| C5 | 3-Methyl Glucose | - | - |
| C6 | D-Fucose | - | - |
| C7 | L-Fucose | - | - |
| C8 | L-Rhamnose | - | - |
| C9 | Inosine | - | - |
| C10 | 1% Sodium Lactate | - | - |
| C11 | Fusidic Acid | - | - |
| C12 | D-Serine | - | - |
| D1 | D-Sorbitol | + | + |
| D2 | D-Mannitol | - | - |
| D3 | D-Arabitol | - | - |
| D4 | myo-Inositol | - | - |
| D5 | Glycerol | + | + |
| D6 | D-Glucose-6-PO4 | - | - |
| D7 | D-Fructose-6-PO4 | - | - |
| D8 | D-Aspartic Acid | - | - |
| D9 | D-Serine | - | - |
| D10 | Troleandomycin | + | + |
| D11 | Rifamycin SV | + | + |
| D12 | Minocycline | - | - |
| E1 | Gelatin | - | - |
| E2 | Glycyl-L-Prolin | - | - |
| E3 | L-Alanine | - | - |
| E4 | L-Arginine | - | - |
| E5 | L-Aspartic Acid | - | - |
| E6 | L-Glutamic Acid | - | - |
| E7 | L-Histidine | - | - |
| E8 | L-Pyroglutamic Acid | - | - |
| E9 | L-Serine | - | - |
| E10 | Lincomycin | - | - |
| E11 | Guanidine HCl | - | - |
| E12 | Niaproof 4 | - | - |
| F1 | Pectin | - | - |
| F2 | D-Galacturonic Acid | - | - |
| F3 | L-Galactonic Acid Lactone | - | - |
| F4 | D-Gluconic Acid | - | - |
| F5 | D-Glucuronic Acid | - | - |
| F6 | Glucuronamide | - | - |
| F7 | Mucic Acid | - | - |
| F8 | Quinic Acid | - | - |
| F9 | D-Saccharic Acid | - | - |
| F10 | Vancomycin | + | + |
| F11 | Tetrazolium Violet | - | - |
| F12 | Tetrazolium Blue | + | + |
| G1 | p-Hydroxy-Phenylacetic Acid | - | - |
| G2 | Methyl Pyruvate | - | - |
| G3 | D-Lactic Acid Methyl Ester | - | - |
| G4 | L-Lactic Acid | - | - |
| G5 | Citric Acid | - | - |
| G6 | α-Keto-Glutaric Acid | - | - |
| G7 | D-Malic Acid | - | - |
| G8 | L-Malic Acid | - | - |
| G9 | Bromo-Succinic Acid | - | - |
| G10 | Nalidixic Acid | - | - |
| G11 | Lithium Chloride | - | - |
| G12 | Potassium Tellurite | - | - |
| H1 | Tween 40 | - | - |
| H2 | γ-Amino-Butryric Acid | - | - |
| H3 | α-Hydroxy-Butyric Acid | - | - |
| H4 | β-Hydroxy-D,L Butyric Acid | - | - |
| H5 | α-Keto-Butyric Acid | - | - |
| H6 | Acetoacetic Acid | + | + |
| H7 | Propionic Acid | - | - |
| H8 | Acetic Acid | + | + |
| H9 | Formic Acid | - | - |
| H10 | Aztreonam | + | + |
| H11 | Sodium Butyrate | - | - |
| H12 | Sodium Bromate | - | - |

**Table S4** Blast results of Endozoicomonadaceae matched to the Tara 16S rRNA Data.

| Tara_ASV_ID | Genome of *Endozoicomonadaceae* | %identity | alignment length | mismatches, | gap opens | q.start | q.end | s.start | s.end | evalue | bit score | Abundance (number of sequence) | Prevalence (% of samples) |
| --- | --- | --- | --- | --- | --- | --- | --- | --- | --- | --- | --- | --- | --- |
| asv0038999 | 6666666.314 | 99.464 | 373 | 2 | 0 | 1 | 373 | 1119256 | 1119628 | 0 | 678 | 11 | 0.102354145 |
| asv0005588 | GCA_000710775.1 | 99.732 | 373 | 1 | 0 | 1 | 373 | 70884 | 70512 | 0 | 684 | 1 | 0.102354145 |
| asv0139226 | GCA_000722635.1 | 99.196 | 373 | 3 | 0 | 1 | 373 | 687470 | 687098 | 0 | 673 | 99 | 0.307062436 |
| asv0123877 | GCA_001562015.1 | 100 | 373 | 0 | 0 | 1 | 373 | 123482 | 123854 | 0 | 689 | 0 | 0 |
| asv0009892 | GCA_001583435.1 | 99.196 | 373 | 3 | 0 | 1 | 373 | 185829 | 186201 | 0 | 673 | 3703 | 2.86591607 |
| asv0064497 | GCA_001646945.1 | 99.196 | 373 | 3 | 0 | 1 | 373 | 692265 | 691893 | 0 | 673 | 0 | 0 |
| asv0326930 | GCA_001646955.1 | 99.196 | 373 | 3 | 0 | 1 | 373 | 569972 | 570344 | 0 | 673 | 0 | 0 |
| asv0001657 | GCA_001647025.2 | 99.732 | 373 | 1 | 0 | 1 | 373 | 4704 | 4332 | 0 | 684 | 1622 | 2.456499488 |
| asv0003106 | GCA_002864045.1 | 99.196 | 373 | 3 | 0 | 1 | 373 | 1189 | 817 | 0 | 673 | 112753 | 13.51074719 |
| asv0003106 | GCA_010994325.1 | 99.196 | 373 | 3 | 0 | 1 | 373 | 454 | 826 | 0 | 673 | 112753 | 13.51074719 |
| asv0501402 | GCA_018263925.1 | 99.198 | 374 | 3 | 0 | 1 | 374 | 660 | 1033 | 0 | 675 | 31 | 0.102354145 |
| asv0017390 | GCA_023502345.1 | 99.196 | 373 | 3 | 0 | 1 | 373 | 570 | 942 | 0 | 673 | 3480 | 1.740020471 |
| asv0003106 | GCA_023716865.1 | 100 | 373 | 0 | 0 | 1 | 373 | 38152 | 38524 | 0 | 689 | 112753 | 13.51074719 |
| asv0038999 | GCA_023822025.1 | 99.196 | 373 | 3 | 0 | 1 | 373 | 1227983 | 1228355 | 0 | 673 | 11 | 0.102354145 |
| asv0062171 | GCA_024509075.1 | 99.464 | 373 | 2 | 0 | 1 | 373 | 973 | 601 | 0 | 678 | 1654 | 1.125895599 |
| asv0203251 | GCA_024606225.1 | 99.196 | 373 | 3 | 0 | 1 | 373 | 1053 | 681 | 0 | 673 | 0 | 0 |
| asv0003106 | GCA_024606265.1 | 99.464 | 373 | 2 | 0 | 1 | 373 | 1053 | 681 | 0 | 678 | 112753 | 13.51074719 |
| asv0008400 | GCA_024606345.1 | 99.196 | 373 | 3 | 0 | 1 | 373 | 769 | 1141 | 0 | 673 | 9829 | 4.60593654 |
| asv0004990 | GCA_025562715.2 | 99.198 | 374 | 1 | 2 | 1 | 373 | 759592 | 759964 | 0 | 673 | 62576 | 8.597748209 |
| asv0015378 | GCA_025562755.1 | 99.196 | 373 | 3 | 0 | 1 | 373 | 1375585 | 1375213 | 0 | 673 | 7069 | 2.149437052 |
| asv0007508 | GCA_025643335.1 | 100 | 374 | 0 | 0 | 1 | 374 | 256342 | 255969 | 0 | 691 | 11077 | 3.889457523 |
| asv0003106 | GCA_027366395.1 | 99.464 | 373 | 2 | 0 | 1 | 373 | 1445346 | 1444974 | 0 | 678 | 112753 | 13.51074719 |
| asv0000823 | GCA_031528575.1 | 100 | 374 | 0 | 0 | 1 | 374 | 1064 | 691 | 0 | 691 | 590764 | 13.40839304 |
| asv0038999 | GCA_032883915.1 | 99.732 | 373 | 1 | 0 | 1 | 373 | 55074 | 55446 | 0 | 684 | 11 | 0.102354145 |
| asv1042036 | GCA_039540975.1 | 99.403 | 335 | 2 | 0 | 1 | 335 | 284 | 618 | 1.19E-174 | 608 | 0 | 0 |
| asv0000650 | GCA_040549045.1 | 99.464 | 373 | 2 | 0 | 1 | 373 | 524580 | 524208 | 0 | 678 | 764266 | 24.87205732 |
| asv0008012 | GCA_900174585.1 | 99.732 | 373 | 1 | 0 | 1 | 373 | 1047 | 675 | 0 | 684 | 3 | 0.307062436 |
| asv0005588 | GCA_900299555.1 | 99.732 | 373 | 1 | 0 | 1 | 373 | 4806 | 4434 | 0 | 684 | 1 | 0.102354145 |
| asv0077353 | GCA_947331445.1 | 99.196 | 373 | 3 | 0 | 1 | 373 | 276 | 648 | 0 | 673 | 241 | 0.204708291 |
| asv0326930 | GCA_947495845.1 | 99.196 | 373 | 3 | 0 | 1 | 373 | 1053 | 681 | 0 | 673 | 0 | 0 |
| asv0000823 | SCSIO12664 | 100 | 374 | 0 | 0 | 1 | 374 | 1557853 | 1558226 | 0 | 691 | 590764 | 13.40839304 |

**Table S5** Results of 16s rRNA sequencing.

|  | Single sample sequence number | Total sequence number | ASV number |
| --- | --- | --- | --- |
| Archaea | 13151 | 355077 | 313 |
| Bacteria | 15602 | 421254 | 4143 |

**Table S6** Analysis of difference of archaeal and bacterial community composition between different sample type based on PERMANOVA, groups with significant differences are shown in bold (p.adjusted < 0.05). LT1: group without treatment at the T1 time point under 25°C; LT2: placebo-treated group at the T2 time point under 25°C, LTB2: SCSIO 12664-treated group at the T2 time point under 25°C; HT1: group without treatment at the T1 time point under 32°C; HT2: placebo-treated group at the T2 time point under 32°C, HTB2: SCSIO 12664-treated group at the T2 time point under 32°C.

| Groups | Archaea | |  | Bacteria | |
| --- | --- | --- | --- | --- | --- |
| R2 | P.adjusted |  | R2 | P.adjusted |
| HT1, HT2 | 0.295 | 0.071 |  | 0.296 | **0.030** |
| HT1, HTB2 | 0.150 | 0.340 |  | 0.294 | **0.030** |
| HT2, HTB2 | 0.159 | 0.371 |  | 0.130 | 0.184 |
| LT1, LT2 | 0.113 | 0.654 |  | 0.239 | **0.031** |
| LT1, LTB2 | 0.198 | 0.371 |  | 0.255 | **0.031** |
| LT2, LTB2 | 0.105 | 0.743 |  | 0.191 | 0.330 |

**Table S7** Network topology parameters of bacterial networks calculated with the network analyzer tool in gephi 0.9.2 software. LT1: group without treatment at the T1 time point under 25°C; LT2: placebo-treated group at the T2 time point under 25°C, LTB2: SCSIO 12664-treated group at the T2 time point under 25°C; HT1: group without treatment at the T1 time point under 32°C; HT2: placebo-treated group at the T2 time point under 32°C, HTB2: SCSIO 12664-treated group at the T2 time point under 32°C.

|  | LT1 | LT2 | LTB2 | HT1 | HT2 | HTB2 |
| --- | --- | --- | --- | --- | --- | --- |
| Node | 228 | 572 | 128 | 159 | 487 | 384 |
| Edge | 5797 | 29033 | 2804 | 1664 | 6455 | 8913 |
| Average degree | 50.850 | 101.514 | 43.812 | 20.930 | 26.509 | 46.42188 |
| Average path length | 1 | 1 | 1 | 1 | 1 | 1 |
| Network diameter | 1 | 1 | 1 | 1 | 1 | 1 |
| Clustering coefficient | 1 | 1 | 1 | 1 | 1 | 1 |
| Density | 0.224 | 0.177 | 0.344 | 0.132 | 0.054 | 0.121 |
| Heterogeneity | 0.900 | 0.566 | 0.228 | 0.975 | 1.035 | 1.167 |
| Centralization | 0.220 | 0.102 | 0.088 | 0.183 | 0.108 | 0.202 |

**Table S8** Network topology parameters of archaeal networks calculated with the network analyzer tool in gephi 0.9.2 software. LT1: group without treatment at the T1 time point under 25°C; LT2: placebo-treated group at the T2 time point under 25°C, LTB2: SCSIO 12664-treated group at the T2 time point under 25°C; HT1: group without treatment at the T1 time point under 32°C; HT2: placebo-treated group at the T2 time point under 32°C, HTB2: SCSIO 12664-treated group at the T2 time point under 32°C.

|  | LT1 | LT2 | LTB2 | HT1 | HT2 | HTB2 |
| --- | --- | --- | --- | --- | --- | --- |
| Node | 7 | 24 | 10 | 71 | 2 | 17 |
| Edge | 11 | 192 | 14 | 1465 | 1 | 28 |
| Average degree | 3.142 | 16.000 | 2.800 | 41.267 | 1 | 3.294 |
| Average path length | 1 | 1 | 1 | 1 | 1 | 1 |
| Network diameter | 1 | 1 | 1 | 1 | 1 | 1 |
| Clustering coefficient | 1 | 1 | 1 | 1 | NA | 1 |
| Density | 0.523 | 0.695 | 0.311 | 0.589 | 1 | 0.205 |
| Heterogeneity | 0.465 | 0.428 | 0.470 | 0.510 | 0 | 0.544 |
| Centralization | 0.142 | 0.130 | 0.133 | 0.167 | 0 | 0.106 |

**Table S9** PERMANOVA-based analysis of functional differences between transcriptomes of different groupings of corals and *Symbiodiniaceae*. LT1: group without treatment at the T1 time point under 25°C; LT2: placebo-treated group at the T2 time point under 25°C, LTB2: SCSIO 12664-treated group at the T2 time point under 25°C; HT1: group without treatment at the T1 time point under 32°C; HT2: placebo-treated group at the T2 time point under 32°C, HTB2: SCSIO 12664-treated group at the T2 time point under 32°C.

| Groups | Coral | |  | *Symbiodiniaceae* | |
| --- | --- | --- | --- | --- | --- |
| R Statistic | P |  | R Statistic | P |
| HT1, HT2 | 1.000 | 0.100 |  | 0.333 | 0.100 |
| HT1, HTB2 | 1.000 | 0.100 |  | 0.519 | 0.100 |
| HT2, HTB2 | 0.556 | 0.100 |  | 0.148 | 0.300 |
| LT1, LT2 | 0.556 | 0.100 |  | 0.111 | 0.500 |
| LT1, LTB2 | 0.370 | 0.200 |  | -0.074 | 0.500 |
| LT2, LTB2 | 0.815 | 0.100 |  | 0.259 | 0.200 |
